# Supplementary material for: Characterizing polyproline II conformational change of collagen superhelix unit on adsorption on gold surface
Source: Royal Society of Chemistry journal article supplement (doi:10.1039/d3na00185g), 2023-01-01

**Table S1.** Model information on collagen systems containing 1-10 PPG units in the presence and absence of Au.

| <b>Number of PPG unit</b> | <b>Gold surface system</b> |                             | <b>Water system</b>              |                            |                                  |
|---------------------------|----------------------------|-----------------------------|----------------------------------|----------------------------|----------------------------------|
|                           | <b>water box dimension</b> | <b>number of gold atoms</b> | <b>number of water molecules</b> | <b>water box dimension</b> | <b>number of water molecules</b> |
| <b>1</b>                  | 100x32x32                  | 768                         | 2844                             | 30x30x30                   | 859                              |
| <b>2</b>                  | 80x32x32                   | 768                         | 2168                             | 40x40x40                   | 1955                             |
| <b>3</b>                  | 150x65x65                  | 3072                        | 18533                            | 48x48x48                   | 3587                             |
| <b>4</b>                  | 150x65x65                  | 3072                        | 18541                            | 54x54x54                   | 4996                             |
| <b>5</b>                  | 150x82x82                  | 4800                        | 29611                            | 62x62x62                   | 7802                             |
| <b>6</b>                  | 150x82x82                  | 4800                        | 29621                            | 70x70x70                   | 11456                            |
| <b>7</b>                  | 150x98x98                  | 6912                        | 43089                            | 78x78x78                   | 15748                            |
| <b>8</b>                  | 150x100x100                | 6912                        | 43048                            | 87x87x87                   | 21494                            |
| <b>9</b>                  | 100x100x100                | 8112                        | 32167                            | 96x96x96                   | 29172                            |
| <b>10</b>                 | 100x100x100                | 8112                        | 32142                            | 105x105x105                | 38199                            |

**Figure S1.** Potential of mean force (PMF) of the biased diffusion process of PPG.

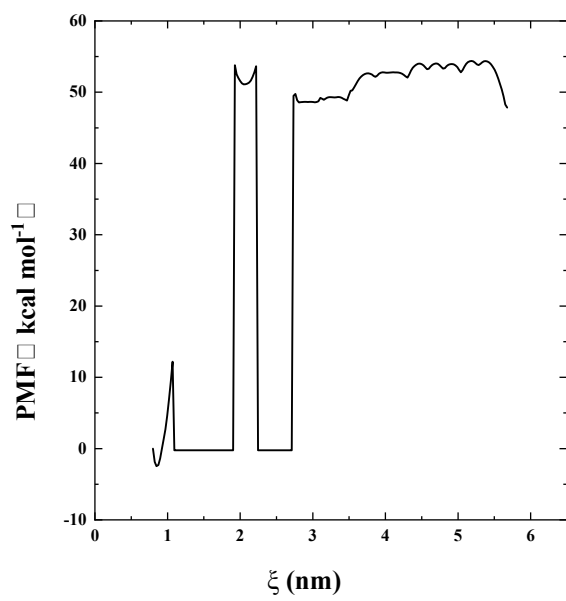

**Figure S2.** A typically trajectory of the MD simulation of PPG-1 on the gold surface: (A) Representative snapshot of the dynamics simulations process (B) The minimum normal distance of the four representative residues in the PPG on the gold surface from initiation to adsorption.

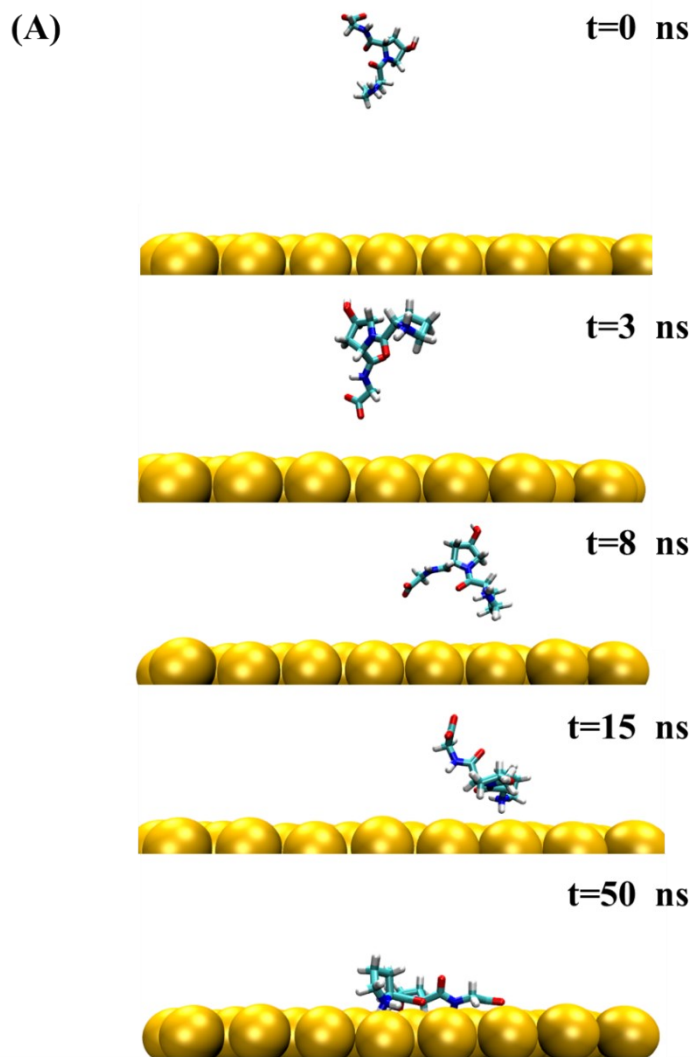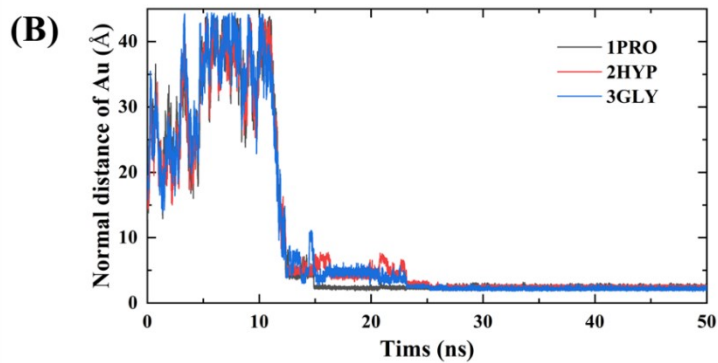

**Figure S3.** A typically trajectory of the MD simulation of PPG-2 on the gold surface: (A) Representative snapshot of the dynamics simulations process (B) The minimum normal distance of the four representative residues in the PPG on the gold surface from initiation to adsorption.

(A)

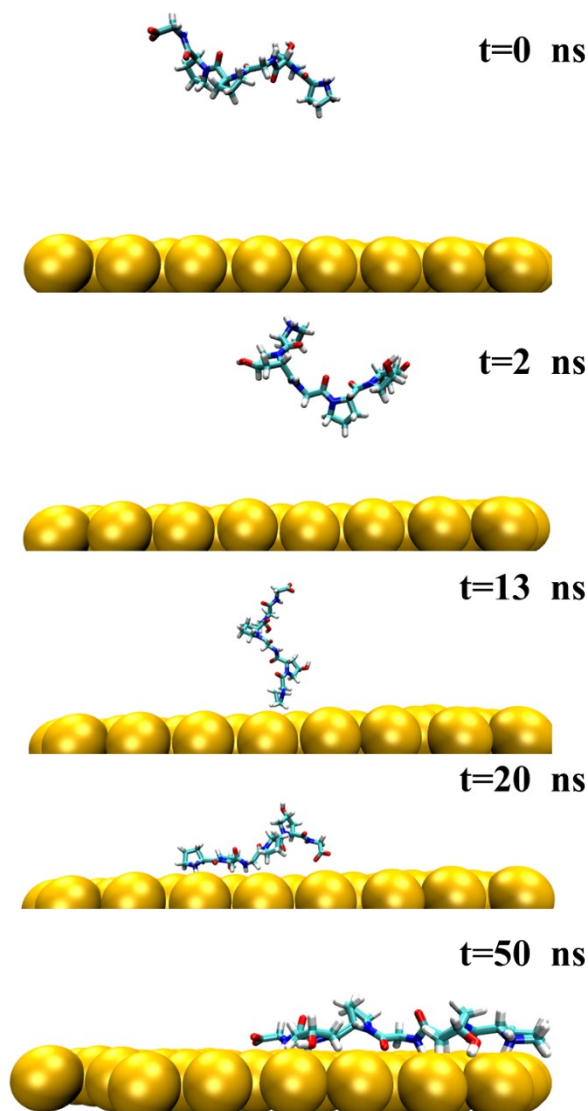

(B)

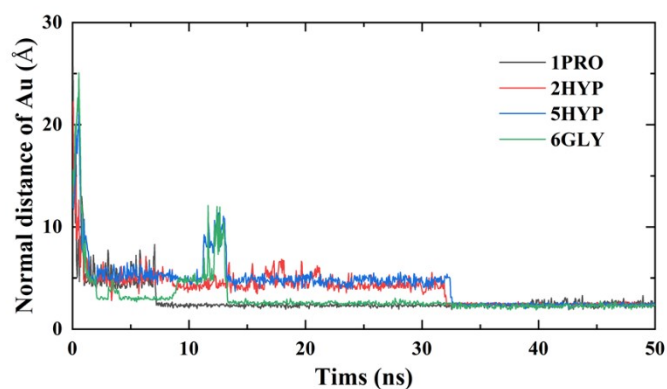

**Figure S4.** A typically trajectory of the MD simulation of PPG-3 on the gold surface: (A) Representative snapshot of the dynamics simulations process (B) The minimum normal distance of the four representative residues in the PPG on the gold surface from initiation to adsorption.

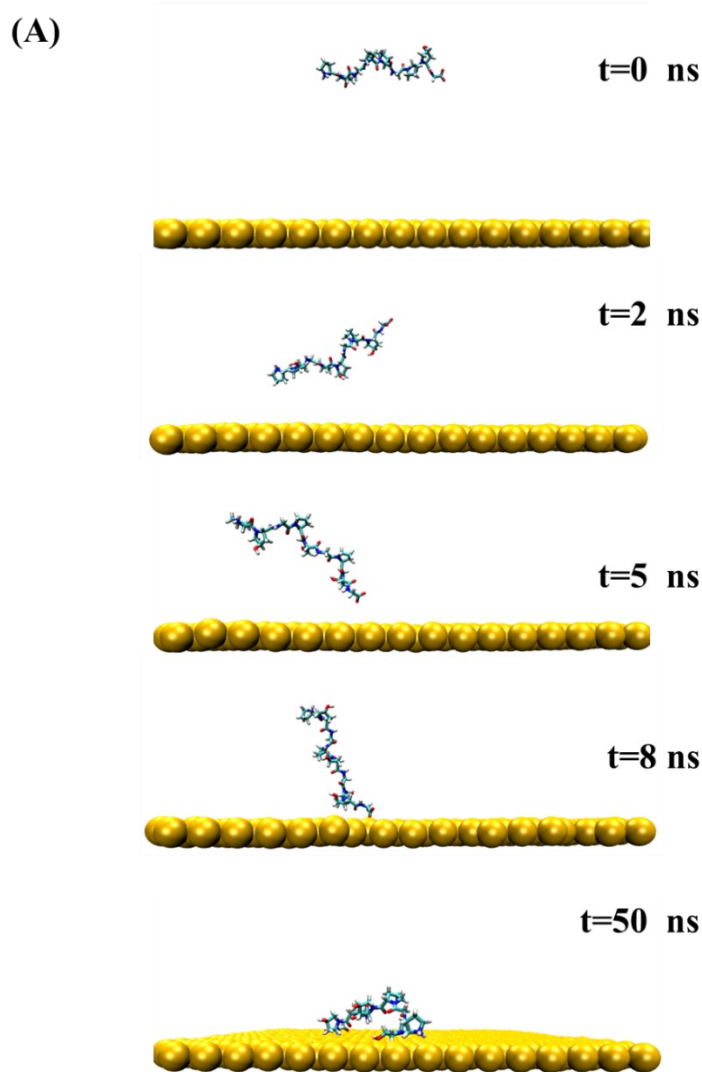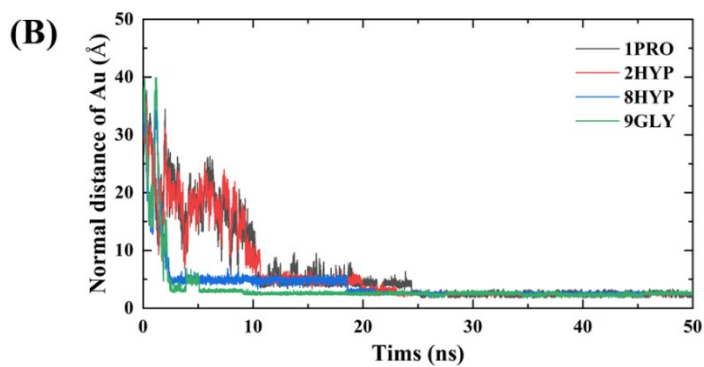

**Figure S5.** A typically trajectory of the MD simulation of PPG-4 on the gold surface: (A) Representative snapshot of the dynamics simulations process (B) The minimum normal distance of the four representative residues in the PPG on the gold surface from initiation to adsorption.

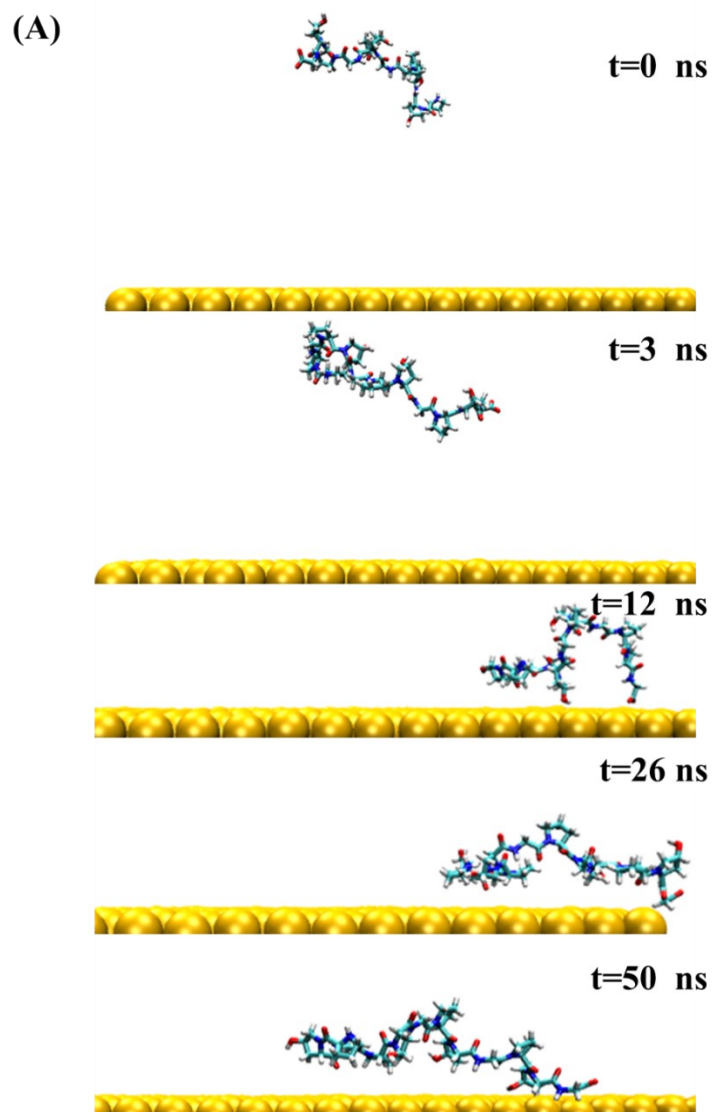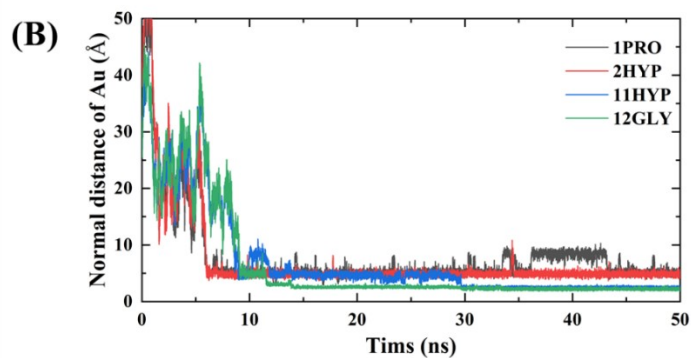

**Figure S6.** A typically trajectory of the MD simulation of PPG-5 on the gold surface: (A) Representative snapshot of the dynamics simulations process (B) The minimum normal distance of the four representative residues in the PPG on the gold surface from initiation to adsorption.

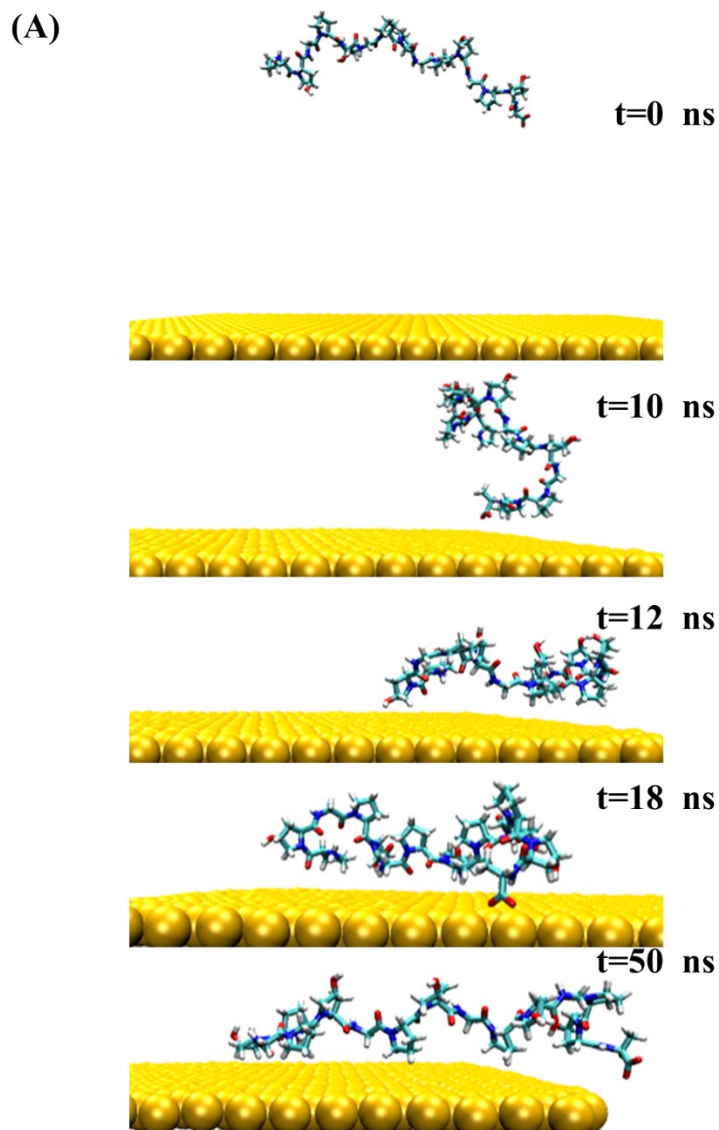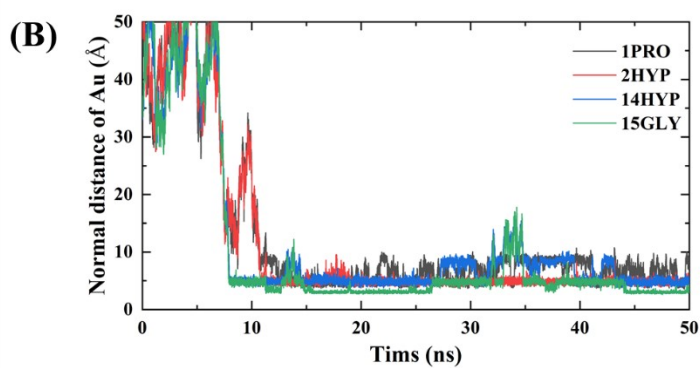

**Figure S7.** A typically trajectory of the MD simulation of PPG-6 on the gold surface: (A) Representative snapshot of the dynamics simulations process (B) The minimum normal distance of the four representative residues in the PPG on the gold surface from initiation to adsorption.

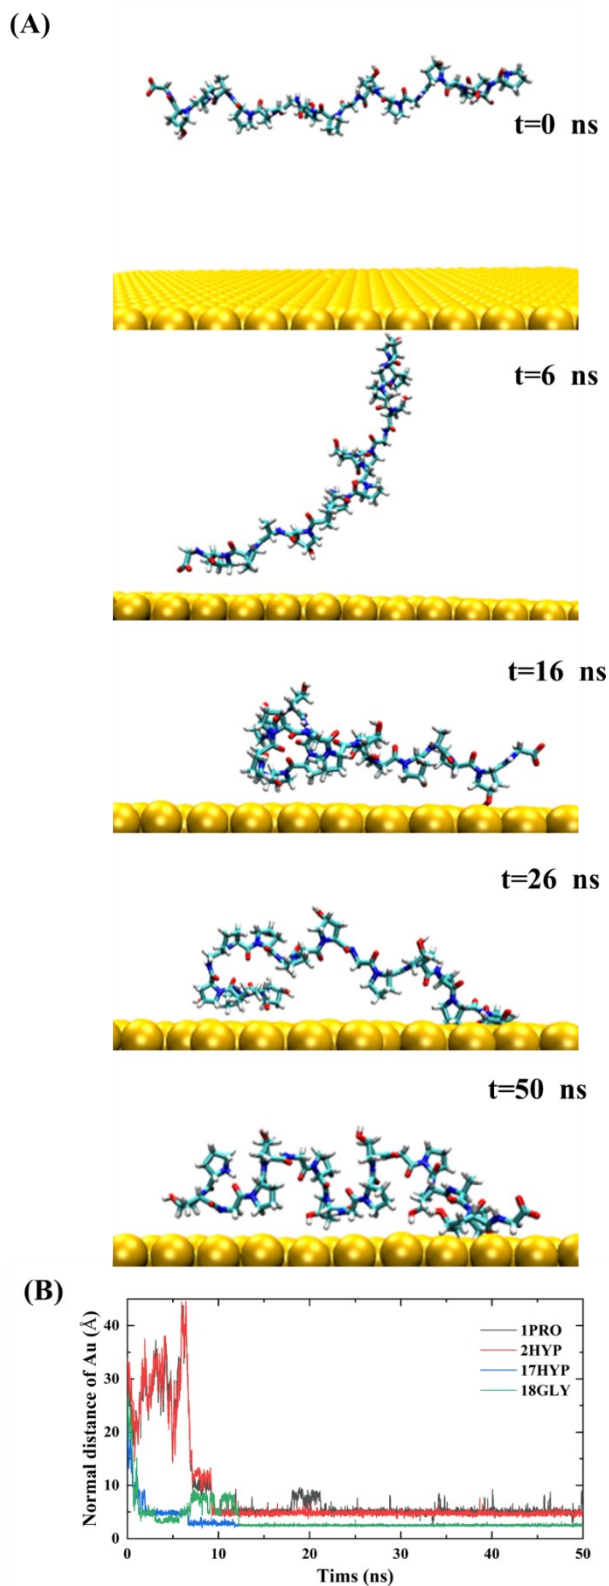



**Figure S8.** A typically trajectory of the MD simulation of PPG-7 on the gold surface: (A) Representative snapshot of the dynamics simulations process (B) The minimum normal distance of the four representative residues in the PPG on the gold surface from initiation to adsorption.

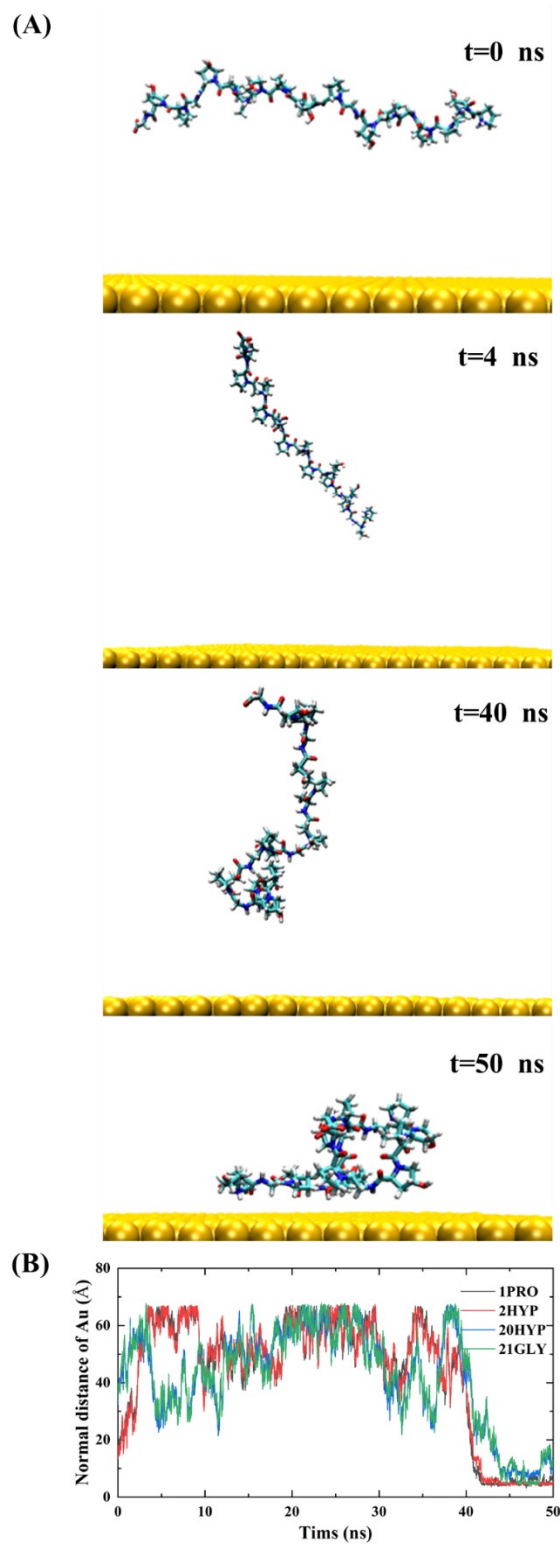

**Figure S9.** A typically trajectory of the MD simulation of PPG-8 on the gold surface: (A) Representative snapshot of the dynamics simulations process (B) The minimum normal distance of the four representative residues in the PPG on the gold surface from initiation to adsorption.

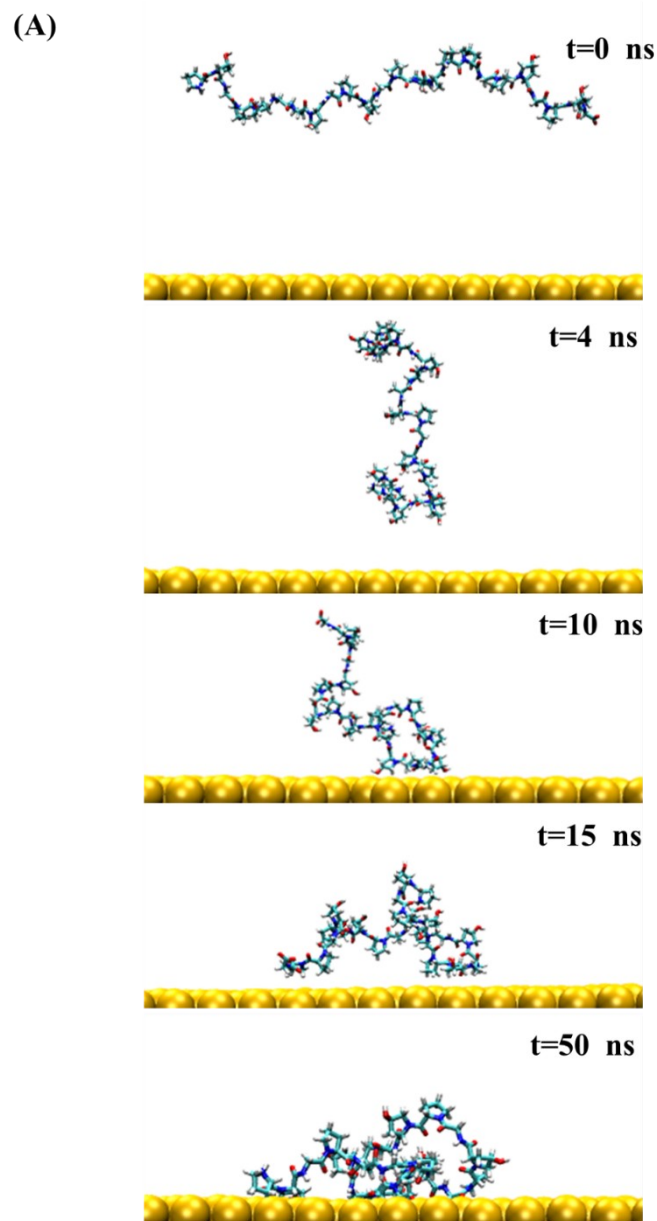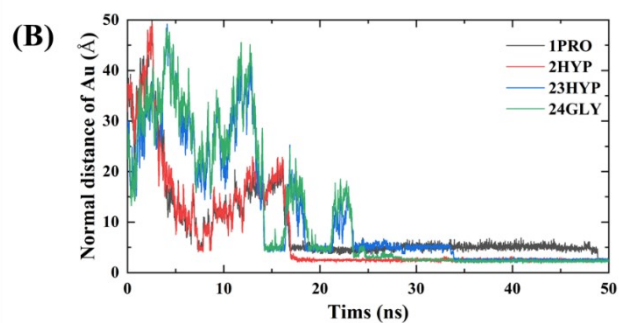

**Figure S10.** A typically trajectory of the MD simulation of PPG-9 on the gold surface: (A) Representative snapshot of the dynamics simulations process (B) The minimum normal distance of the four representative residues in the PPG on the gold surface from initiation to adsorption.

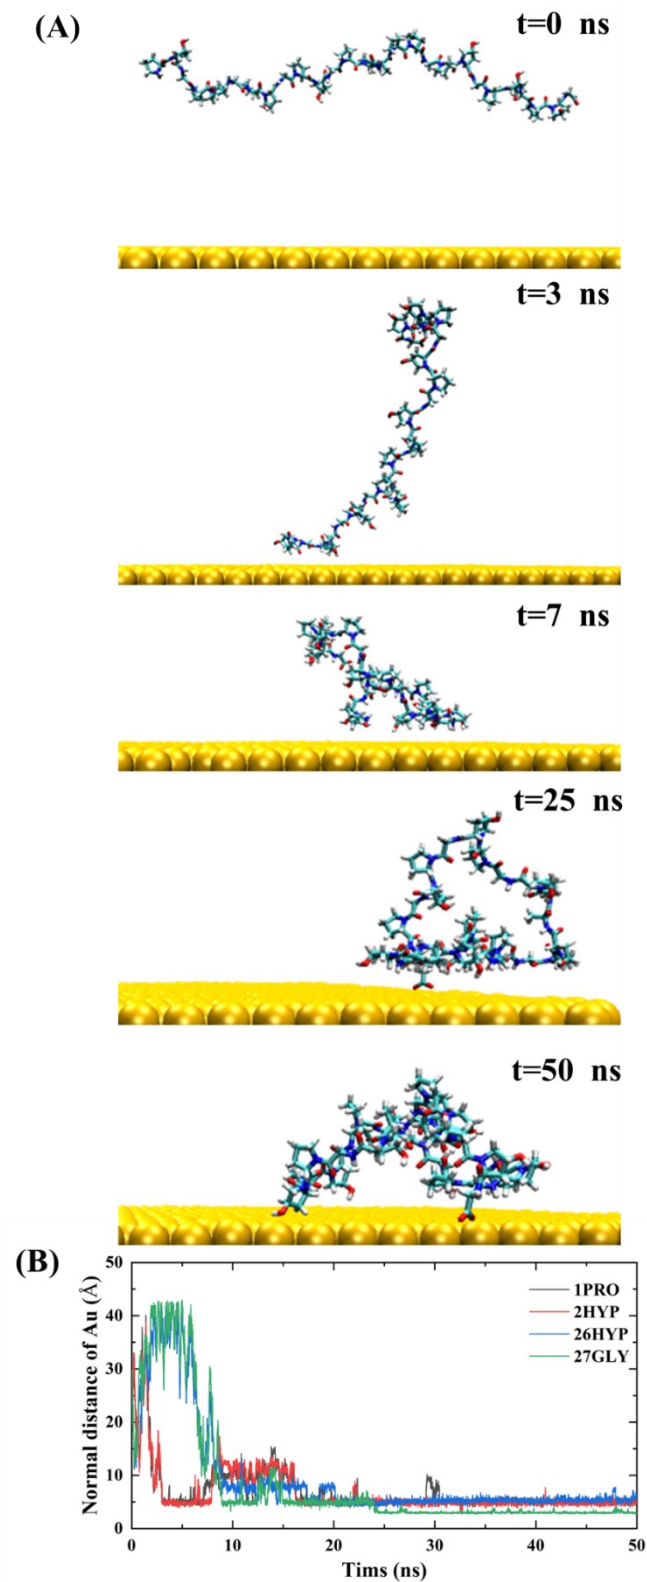

**Figure S11.** A typically trajectory of the MD simulation of PPG-10 on the gold surface: (A) Representative snapshot of the dynamics simulations process (B) The minimum normal distance of the four representative residues in the PPG on the gold surface from initiation to adsorption.

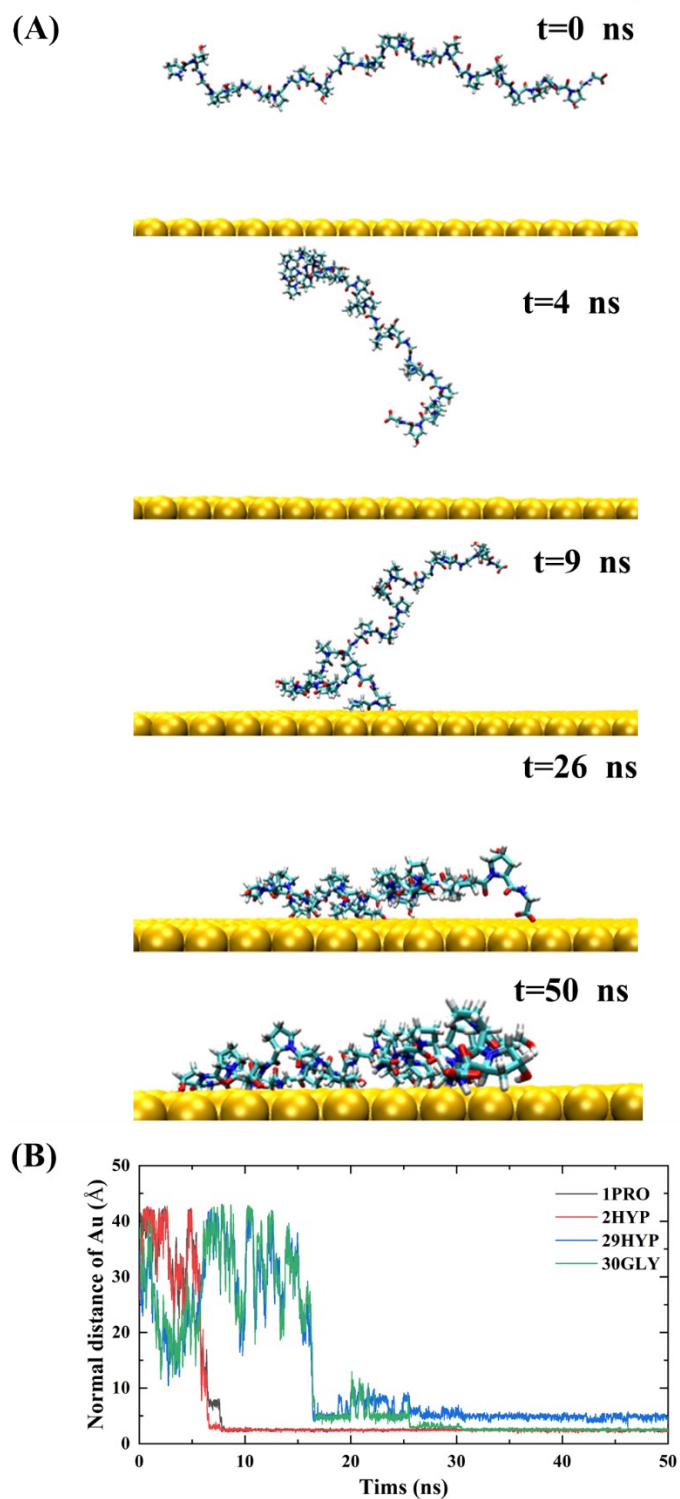

**Table S2.** In the 30 simulated trajectories, the number of times the following residues entered the first and second water layers as anchoring residues

|                           | <b>N-terminal</b> | <b>C- terminal</b> |
|---------------------------|-------------------|--------------------|
| <b>second water layer</b> | 14                | 16                 |
| <b>first water layer</b>  | 11                | 19                 |

**Figure S12.** RDF for the interaction of the O atoms of water with gold.

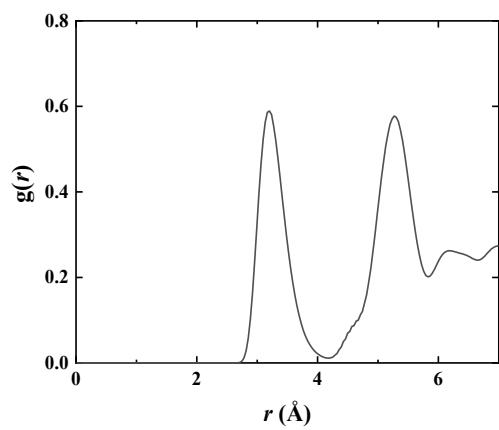

**Figure S13.** RDFs for the interaction of the backbone atoms of collagen systems containing 1-10 PPG units (i.e. O, N, C, and CA) with gold.

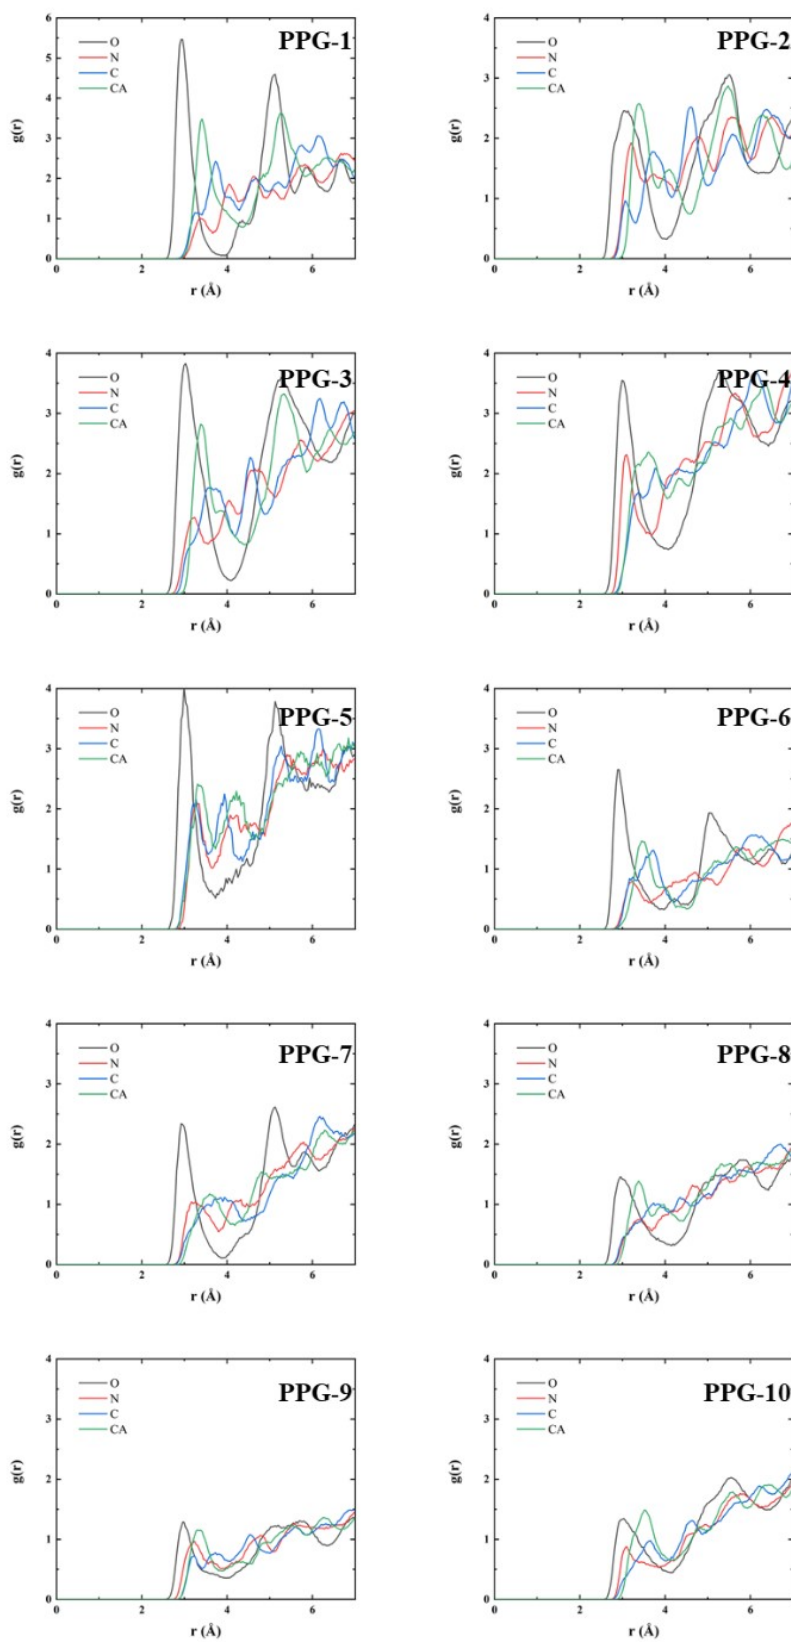

Supplement: d3na00185g1.pdf [file d3na00185g1.pdf]
